# Supplementary material for: Gemcitabine Direct Electrochemical Detection from Pharmaceutical Formulations Using a Boron-Doped Diamond Electrode
Source: MDPI journal article supplement (doi:10.3390/ph14090912), 2021-09-10
Supplement: s1 [file s1]

# Gemcitabine Direct Electrochemical Detection from Pharmaceutical Formulations Using Boron Doped Diamond Electrode

Iulia Rus <sup>1#</sup>, Alexandra Pusta <sup>1,2#</sup>, Mihaela Tertiş <sup>1</sup>, Cristina Barbălată <sup>3</sup>, Ioan Tomuță <sup>3</sup>, Robert Săndulescu <sup>1</sup> and Cecilia Cristea <sup>1,\*</sup>

<sup>1</sup> Department of Analytical Chemistry, Iuliu Hațieganu University of Medicine and Pharmacy, 4 Louis Pasteur Street 400349, Cluj-Napoca, Romania; rus.iulia@umfcluj.ro (I.R.); alexandrapusta@gmail.com (A.P.); mihaela.tertis@umfcluj.ro (M.T.); rsandulescu@umfcluj.ro (R.S.); ccristea@umfcluj.ro (C.C.)

<sup>2</sup> Department of Medical Devices, Iuliu Hațieganu University of Medicine and Pharmacy, 4 Louis Pasteur Street 400349, Cluj-Napoca, Romania; alexandrapusta@gmail.com

<sup>3</sup> Department of Pharmaceutical Technology and Biopharmaceutics, Iuliu Hațieganu University of Medicine and Pharmacy, 41 Victor Babeș Street 400012, Cluj-Napoca, Romania; barbalata.cristina@umfcluj.ro (C.B.); tomutaioan@umfcluj.ro (I.T.)

\* Correspondence: ccristea@umfcluj.ro; 4 Louis Pasteur Street 400349, Cluj-Napoca, Romania; Tel.: +40 721 375 789

# Authors with equal contributions

**S1:** The DPVs registered for 20 µg/mL gemcitabine in the range of 0.5-2.5 V on BDDE compared with the one registered in the same potential range in the absence of the analyte

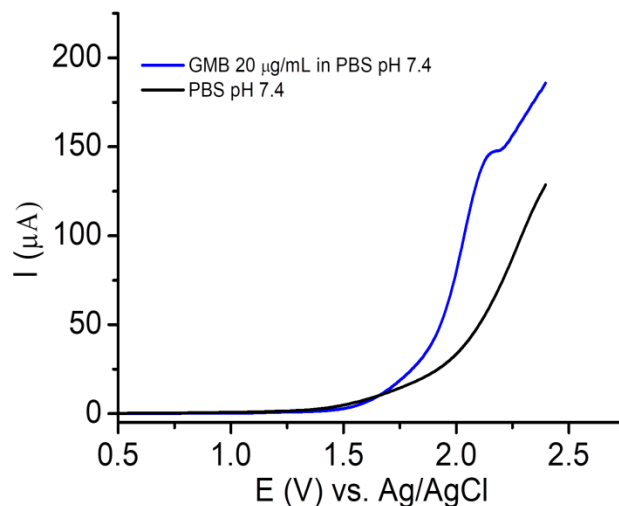

**Figure S1.** The voltammograms registered using the optimized DPV procedure for phosphate buffer saline (PBS) solution of pH 7.4 (black) and 20 µg/mL gemcitabine (GMB) in PBS (pH 7.4; 0.05 M)

**S2:** The dependence between the oxidation potential of gemcitabine and the pH of the electrolyte

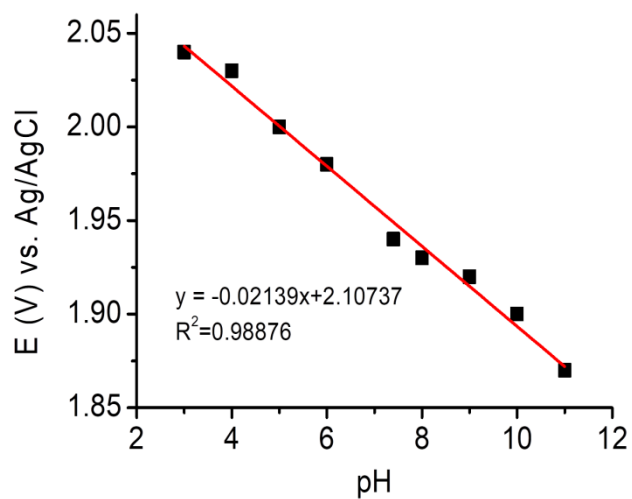

**Figure S2.** The variation of the oxidation potential of gemcitabine (GMB) with the pH of the electrolyte solution.
